# Supplementary material for: Identification and quantification of phytochelatins in roots of rice to long-term exposure: evidence of individual role on arsenic accumulation and translocation
Source: PubMed Central journal article supplement (PMC3967088; doi:10.1093/jxb/eru018), 2014-03-05
Supplement: supp_eru018_jexbot108928_file001.pdf [file supp_eru018_jexbot108928_file001.pdf]

**Supporting Information for:**

**Identification and quantification of phytochelatins in roots of rice to long-term exposure: evidence of individual role on arsenic accumulation**

Bruno Lemos Batista<sup>a,e</sup>, Meher Nigar<sup>b</sup>, Adrien Mestrot<sup>c</sup>, Bruno Alves Rocha<sup>d</sup>, Fernando Barbosa Júnior<sup>e</sup>, Adam H. Price<sup>b</sup>, Andrea Raab<sup>f</sup>, Jörg Feldmann<sup>f\*</sup>

<sup>a</sup>Centro de Ciências Naturais e Humanas, Universidade Federal do ABC, Bloco B, Av. dos Estados 5001, Santo André (SP), Brazil.

<sup>b</sup>Institute of Biological and Environmental Sciences, University of Aberdeen, Cruickshank Building, St. Machar Drive, Aberdeen AB24 3UU, UK.

<sup>c</sup>Soil Science Group, Institut of Geography, University of Bern, Hallerstrasse 12, 3012, Bern, Switzerland.

<sup>d</sup>Departamento de Química, Faculdade de Filosofia Ciências e Letras de Ribeirão Preto, Universidade de São Paulo, Avenida Bandeirantes, 3900, Ribeirão Preto (SP), Brazil.

<sup>e</sup>Faculdade de Ciências Farmacêuticas de Ribeirão Preto, Universidade de São Paulo, Bloco A, Av. do Café s/n, Ribeirão Preto (SP), Brazil.

<sup>f</sup>School of Engineering and Physical Science, University of Aberdeen, MestonWalk, Aberdeen, Scotland, AB24 3UE, UK.

\* Corresponding author: e-mail: j.feldmann@abdn.ac.uk

**Supporting Information Table S1.** Description of agronomic parameters. Results expressed as mean or mean  $\pm$  standard deviation (n=4).

| Rice cultivar    | Exposure level | Abbreviation | F(days) | PH(cm) | SD(mm)          | GY(g) | SS(mm)           | NT | PM(g)  |
|------------------|----------------|--------------|---------|--------|-----------------|-------|------------------|----|--------|
| Italica Carolina | <i>Low</i>     | IC(L)        | 51      | 101.5* | 22.8 $\pm$ 2.5  | 9.59* | 7.77 $\pm$ 0.78* | 5  | 102.8* |
|                  | <i>High</i>    | IC(H)        | 51      | 89.6   | 17.8 $\pm$ 4.4  | 4.34  | 6.71 $\pm$ 0.65  | 4  | 90.6   |
| Dom Sofid        | <i>Low</i>     | DS(L)        | 87      | 137.5  | 19.0 $\pm$ 3.1  | 7.18* | 8.04 $\pm$ 0.43  | 4  | 138.4  |
|                  | <i>High</i>    | DS(H)        | 88      | 128.5  | 17.7 $\pm$ 6.9  | 5.40  | 8.05 $\pm$ 0.65  | 4  | 129.4  |
| 9524             | <i>Low</i>     | 9(L)         | 91      | 140.5  | 23.1 $\pm$ 2.5  | 10.64 | 7.13 $\pm$ 0.51* | 4  | 141.4  |
|                  | <i>High</i>    | 9(H)         | 94      | 133.8  | 19.7 $\pm$ 2.6  | 8.68  | 6.73 $\pm$ 0.44  | 4  | 134.6  |
| Kitrana 508      | <i>Low</i>     | K(L)         | 94      | 155.3  | 17.8 $\pm$ 2.2  | 6.99* | 7.49 $\pm$ 0.16* | 4  | 156.1  |
|                  | <i>High</i>    | K(H)         | 94      | 150.5  | 16.1 $\pm$ 1.5  | 5.80  | 7.00 $\pm$ 0.24  | 3  | 151.3  |
| YRL-1            | <i>Low</i>     | Y(L)         | 91      | 115.8  | 24.1 $\pm$ 4.8  | 11.81 | 7.64 $\pm$ 0.45  | 5  | 116.9  |
|                  | <i>High</i>    | Y(H)         | 91      | 110.5  | 23.7 $\pm$ 6.2  | 10.17 | 7.37 $\pm$ 0.54  | 5  | 111.8  |
| Lemont           | <i>Low</i>     | L(L)         | 102     | 76.9   | 27.1 $\pm$ 2.0* | 9.46  | 7.34 $\pm$ 0.45  | 4  | 77.9   |
|                  | <i>High</i>    | L(H)         | 107     | 83.4   | 21.3 $\pm$ 2.9  | 7.88  | 7.18 $\pm$ 0.44  | 3  | 84.2   |

**PH:** plant height; **PM:** plant mass (biomass mean of roots+shoots+grains); **F:** time to flowering (mean of 4 replicates); **SD:** stems diameter; **GY:** grain yield (mean of biomass of all panicles produced by the plant); **SL:** seed length; **NT:** number of tillers; \*: significant statistical differences between low and high exposure level (P<0.05).

**Supporting Information Table S2.** Correlations between agronomic parameters and t-As (n= 48, low and high exposure levels).

| <b>Variables</b>                                          | <b>Flowering<br/>(days)</b> | Plant<br>height<br>(cm) | <b>Grains<br/>weight<br/>(g)</b> | Shoots<br>diameter<br>(mm) | <b>Roots<br/>weight<br/>(g)</b> | Shoots<br>weight<br>(g) | <b>All plant<br/>weight (g)</b> | [As] roots<br>( $\mu\text{g kg}^{-1}$ ) | <b>[As] shoots<br/>(<math>\mu\text{g kg}^{-1}</math>)</b> | [As] grains<br>( $\mu\text{g kg}^{-1}$ ) |
|-----------------------------------------------------------|-----------------------------|-------------------------|----------------------------------|----------------------------|---------------------------------|-------------------------|---------------------------------|-----------------------------------------|-----------------------------------------------------------|------------------------------------------|
| Plant height<br>(cm)                                      | .758**                      |                         |                                  |                            |                                 |                         |                                 |                                         |                                                           |                                          |
| <b>Grains<br/>weight (g)</b>                              | <b>.156</b>                 | <b>.090</b>             |                                  |                            |                                 |                         |                                 |                                         |                                                           |                                          |
| Shoots'<br>diameter<br>(mm)                               | .559**                      | .401*                   | .269                             |                            |                                 |                         |                                 |                                         |                                                           |                                          |
| <b>Roots<br/>weight (g)</b>                               | <b>.713**</b>               | <b>.730**</b>           | <b>.484**</b>                    | <b>.458**</b>              |                                 |                         |                                 |                                         |                                                           |                                          |
| Shoots<br>weight (g)                                      | .649**                      | .619**                  | .576**                           | .618**                     | .813**                          |                         |                                 |                                         |                                                           |                                          |
| <b>All plant<br/>weight (g)</b>                           | <b>.720**</b>               | <b>.749**</b>           | <b>.517**</b>                    | <b>.494**</b>              | <b>.989**</b>                   | <b>.865**</b>           |                                 |                                         |                                                           |                                          |
| [As] roots<br>( $\mu\text{g kg}^{-1}$ )                   | -.118                       | -.166                   | -.775**                          | -.339                      | -.366*                          | -.602**                 | -.421*                          |                                         |                                                           |                                          |
| <b>[As] shoots<br/>(<math>\mu\text{g kg}^{-1}</math>)</b> | <b>-.353*</b>               | <b>-.259</b>            | <b>-.631**</b>                   | <b>-.369*</b>              | <b>-.541**</b>                  | <b>-.685**</b>          | <b>-.581**</b>                  | <b>.740**</b>                           |                                                           |                                          |
| [As] grains<br>( $\mu\text{g kg}^{-1}$ )                  | -.191                       | -.286                   | -.552**                          | -.330                      | -.342                           | -.458**                 | -.372*                          | .685**                                  | .739**                                                    |                                          |
| <b>[As] soil<br/>(<math>\mu\text{g kg}^{-1}</math>)</b>   | <b>-.066</b>                | <b>-.282</b>            | <b>-.621**</b>                   | <b>-.059</b>               | <b>-.322</b>                    | <b>-.336</b>            | <b>-.369*</b>                   | <b>.575**</b>                           | <b>.342</b>                                               | <b>.355*</b>                             |

[As]: arsenic concentration; \*: P<0.05; \*\*: P<0.01.

**Supporting Information Table 3.** Theoretical, experimental and accurate masses ( $\Delta m$ ), retention time (RT) and molecular formula of GSH, free PCs and PCs-As identified and quantified in the present study. Values presented as mean  $\pm$  standard deviation (n=48), . NI: non ionized.

| <b>Compound</b>                    | <b>[GSH+H]<sup>+</sup></b>                                                    | <b>[As-OH-Me-PC<sub>3</sub>+H]<sup>+</sup></b>                                   | <b>[GSSG+H]<sup>+</sup></b>                                                   | <b>[PC<sub>3</sub>+H]<sup>+</sup></b>                                            |
|------------------------------------|-------------------------------------------------------------------------------|----------------------------------------------------------------------------------|-------------------------------------------------------------------------------|----------------------------------------------------------------------------------|
| <i>Theoretical m/z</i>             | 308.0916                                                                      | 874.1039                                                                         | 613.1598                                                                      | 772.1951                                                                         |
| <i>Experimental m/z</i>            | 308.0907 $\pm$ 0.0002                                                         | 874.1022 $\pm$ 0.0011                                                            | 613.1584 $\pm$ 0.0004                                                         | 772.1937 $\pm$ 0.0009                                                            |
| <i><math>\Delta m</math> (ppm)</i> | 3.02 $\pm$ 0.90                                                               | 1.86 $\pm$ 1.32                                                                  | 2.06 $\pm$ 1.09                                                               | 1.82 $\pm$ 1.17                                                                  |
| <i>RT (min)</i>                    | 3.93 $\pm$ 0.11                                                               | 17.95 $\pm$ 0.16                                                                 | 7.47 $\pm$ 0.18                                                               | 18.49 $\pm$ 0.25                                                                 |
| <i>Molecular formula (NI)</i>      | C <sub>10</sub> H <sub>17</sub> O <sub>6</sub> N <sub>3</sub> S               | C <sub>27</sub> H <sub>40</sub> O <sub>15</sub> N <sub>7</sub> S <sub>3</sub> As | C <sub>20</sub> H <sub>32</sub> O <sub>12</sub> N <sub>6</sub> S <sub>2</sub> | C <sub>26</sub> H <sub>41</sub> O <sub>14</sub> N <sub>7</sub> S <sub>3</sub>    |
| <b>Compound</b>                    | <b>[OH-Me-PC<sub>2</sub>+H]<sup>+</sup></b>                                   | <b>[As-PC<sub>3</sub>+H]<sup>+</sup></b>                                         | <b>[PC<sub>2</sub> Reduced+H]<sup>+</sup></b>                                 | <b>[As-Iso-PC<sub>3</sub>-Glu+H]<sup>+</sup></b>                                 |
| <i>Theoretical m/z</i>             | 570.1539                                                                      | 844.0932                                                                         | 540.1434                                                                      | 916.1145                                                                         |
| <i>Experimental m/z</i>            | 570.1527 $\pm$ 0.0003                                                         | 844.0918 $\pm$ 0.0012                                                            | 540.1422 $\pm$ 0.0003                                                         | 916.1135 $\pm$ 0.0015                                                            |
| <i><math>\Delta m</math> (ppm)</i> | 2.22 $\pm$ 0.67                                                               | 1.67 $\pm$ 1.45                                                                  | 2.08 $\pm$ 0.68                                                               | 1.09 $\pm$ 1.61                                                                  |
| <i>RT (min)</i>                    | 11.22 $\pm$ 0.27                                                              | 18.59 $\pm$ 0.16                                                                 | 11.83 $\pm$ 0.27                                                              | 19.04 $\pm$ 0.87                                                                 |
| <i>Molecular formula (NI)</i>      | C <sub>19</sub> H <sub>31</sub> O <sub>11</sub> N <sub>5</sub> S <sub>2</sub> | C <sub>26</sub> H <sub>38</sub> O <sub>14</sub> N <sub>7</sub> S <sub>3</sub> As | C <sub>18</sub> H <sub>29</sub> O <sub>10</sub> N <sub>5</sub> S <sub>2</sub> | C <sub>29</sub> H <sub>42</sub> O <sub>16</sub> N <sub>7</sub> S <sub>3</sub> As |
| <b>Compound</b>                    | <b>[DesGly-PC<sub>2</sub>+H]<sup>+</sup></b>                                  | <b>[As-DesGly-PC<sub>3</sub>+H]<sup>+</sup></b>                                  | <b>[PC<sub>2</sub> oxidized+H]<sup>+</sup></b>                                | <b>[As-PC<sub>4</sub>+H]<sup>+</sup></b>                                         |
| <i>Theoretical m/z</i>             | 483.1219                                                                      | 787.0718                                                                         | 538.1278                                                                      | 1076.1451                                                                        |
| <i>Experimental m/z</i>            | 483.1205 $\pm$ 0.0003                                                         | 787.0704 $\pm$ 0.0005                                                            | 538.1266 $\pm$ 0.0003                                                         | 1076.1438 $\pm$ 0.0016                                                           |
| <i><math>\Delta m</math> (ppm)</i> | 2.95 $\pm$ 0.80                                                               | 1.83 $\pm$ 0.71                                                                  | 2.11 $\pm$ 0.68                                                               | 1.28 $\pm$ 1.35                                                                  |
| <i>RT (min)</i>                    | 12.28 $\pm$ 0.33                                                              | 19.48 $\pm$ 0.33                                                                 | 12.61 $\pm$ 0.22                                                              | 23.42 $\pm$ 0.34                                                                 |
| <i>Molecular formula (NI)</i>      | C <sub>16</sub> H <sub>26</sub> O <sub>9</sub> N <sub>4</sub> S <sub>2</sub>  | C <sub>24</sub> H <sub>35</sub> O <sub>13</sub> N <sub>6</sub> S <sub>3</sub> As | C <sub>18</sub> H <sub>27</sub> O <sub>10</sub> N <sub>5</sub> S <sub>2</sub> | C <sub>34</sub> H <sub>50</sub> O <sub>18</sub> N <sub>9</sub> S <sub>4</sub> As |
| <b>Compound</b>                    | <b>[Iso-PC<sub>2</sub>-Glu+H]<sup>+</sup></b>                                 | <b>[Iso-PC<sub>3</sub>-Glu+H]<sup>+</sup></b>                                    |                                                                               |                                                                                  |
| <i>Theoretical m/z</i>             | 612.1645                                                                      | 844.2163                                                                         |                                                                               |                                                                                  |
| <i>Experimental m/z</i>            | 612.1634 $\pm$ 0.0006                                                         | 844.2163 $\pm$ 0.0021                                                            |                                                                               |                                                                                  |
| <i><math>\Delta m</math> (ppm)</i> | 1.87 $\pm$ 0.99                                                               | 0.01 $\pm$ 2.42                                                                  |                                                                               |                                                                                  |
| <i>RT (min)</i>                    | 14.30 $\pm$ 0.25                                                              | 20.75 $\pm$ 0.60                                                                 |                                                                               |                                                                                  |
| <i>Molecular formula (NI)</i>      | C <sub>21</sub> H <sub>33</sub> O <sub>12</sub> N <sub>5</sub> S <sub>2</sub> | C <sub>29</sub> H <sub>45</sub> O <sub>16</sub> N <sub>7</sub> S <sub>3</sub>    |                                                                               |                                                                                  |
